# Supplementary material
Source: PubMed Central journal article supplement (PMC10623889)
Supplement: NIHMS1927874-supplement-appendix.pdf [file NIHMS1927874-supplement-appendix.pdf]

# Appendix A. Race and Ethnicity Gaps in Frequent AFS use and Fully-Banked Status

|                                               | Frequent AFS users    |                            |                            | Fully Banked          |                           |                           |
|-----------------------------------------------|-----------------------|----------------------------|----------------------------|-----------------------|---------------------------|---------------------------|
|                                               | (1)                   | (2)                        | (3)                        | (1)                   | (2)                       | (3)                       |
| Hispanic/Latino                               | 0.0821***<br>(0.0269) | 0.111***<br>(0.0303)       | 0.109***<br>(0.0311)       | -0.169***<br>(0.0295) | -0.104***<br>(0.0316)     | -0.0799**<br>(0.0315)     |
| Non-Hispanic Black                            | 0.265***<br>(0.0311)  | 0.226***<br>(0.0317)       | 0.213***<br>(0.0330)       | -0.356***<br>(0.0341) | -0.239***<br>(0.0331)     | -0.178***<br>(0.0335)     |
| Male                                          |                       | -0.0167<br>(0.0222)        | -0.0177<br>(0.0228)        |                       | -0.00769<br>(0.0232)      | -0.0173<br>(0.0232)       |
| Age                                           |                       | 0.0158***<br>(0.00490)     | 0.0163***<br>(0.00492)     |                       | -0.0105**<br>(0.00511)    | -0.0111**<br>(0.00499)    |
| Age squared                                   |                       | -0.000184***<br>(5.47e-05) | -0.000186***<br>(5.50e-05) |                       | 0.000169***<br>(5.71e-05) | 0.000151***<br>(5.59e-05) |
| US_born                                       |                       | 0.116***<br>(0.0431)       | 0.133***<br>(0.0435)       |                       | -0.0699<br>(0.0450)       | -0.0870**<br>(0.0441)     |
| US citizen                                    |                       | -0.0259<br>(0.0618)        | 0.000418<br>(0.0624)       |                       | 0.0226<br>(0.0645)        | -0.0239<br>(0.0634)       |
| Less than high school                         |                       | 0.0964***<br>(0.0360)      | 0.0931**<br>(0.0378)       |                       | -0.260***<br>(0.0375)     | -0.181***<br>(0.0384)     |
| Highschool graduate                           |                       | -0.0228<br>(0.0304)        | -0.0273<br>(0.0319)        |                       | -0.0789**<br>(0.0317)     | -0.0120<br>(0.0324)       |
| Some college                                  |                       | 0.102***<br>(0.0344)       | 0.103***<br>(0.0345)       |                       | -0.117***<br>(0.0358)     | -0.101***<br>(0.0350)     |
| Family income below 20K                       |                       | 0.105***<br>(0.0325)       | 0.0916***<br>(0.0333)      |                       | -0.182***<br>(0.0339)     | -0.118***<br>(0.0338)     |
| Family income between 20 and 35K              |                       | 0.101***<br>(0.0330)       | 0.0937***<br>(0.0335)      |                       | -0.126***<br>(0.0345)     | -0.0844**<br>(0.0341)     |
| Unemployed                                    |                       | 0.0608**<br>(0.0310)       | 0.0559*<br>(0.0315)        |                       | -0.179***<br>(0.0323)     | -0.151***<br>(0.0320)     |
| Disabled                                      |                       | 0.0443<br>(0.0332)         | 0.0383<br>(0.0336)         |                       | -0.137***<br>(0.0346)     | -0.106***<br>(0.0341)     |
| Retired                                       |                       | 0.0838*<br>(0.0467)        | 0.0863*<br>(0.0472)        |                       | -0.0831*<br>(0.0488)      | -0.0689<br>(0.0480)       |
| Other                                         |                       | -0.0530*<br>(0.0317)       | -0.0577*<br>(0.0322)       |                       | -0.0651**<br>(0.0331)     | -0.0481<br>(0.0328)       |
| Fin. Lit: inflation, interest and risk factor |                       |                            | -0.00298<br>(0.0121)       |                       |                           | 0.0493***<br>(0.0122)     |
| Fin. Lit: savings factor                      |                       |                            | 0.00571<br>(0.0114)        |                       |                           | 0.00904<br>(0.0116)       |
| Fin. Lit: basic calculations factor           |                       |                            | 0.00360<br>(0.0129)        |                       |                           | 0.0278**<br>(0.0131)      |
| Network: friends and family                   |                       |                            | 0.0370<br>(0.0330)         |                       |                           | -0.217***<br>(0.0335)     |
| Network: stores                               |                       |                            | 0.138***                   |                       |                           | -0.143***                 |

|                                        |                      |                      |                      |                      |                     |                       |
|----------------------------------------|----------------------|----------------------|----------------------|----------------------|---------------------|-----------------------|
|                                        |                      |                      | (0.0389)             |                      |                     | (0.0395)              |
| Trust in financial institutions factor |                      |                      | -0.00864<br>(0.0116) |                      |                     | 0.0359***<br>(0.0117) |
| Present Biased                         |                      |                      | 0.00192<br>(0.0345)  |                      |                     | -0.0102<br>(0.0350)   |
| Future Biased                          |                      |                      | 0.0104<br>(0.0254)   |                      |                     | 0.0268<br>(0.0258)    |
| Constant                               | 0.208***<br>(0.0140) | -0.313***<br>(0.114) | -0.352***<br>(0.116) | 0.678***<br>(0.0153) | 1.113***<br>(0.119) | 1.112***<br>(0.117)   |
| Observations                           | 1,561                | 1,561                | 1,550                | 1,561                | 1,561               | 1,550                 |
| R-squared                              | 0.045                | 0.092                | 0.103                | 0.072                | 0.202               | 0.249                 |

Notes: Authors' calculations using ALP data, survey 276, using survey weights. Sample restricted to families with less than 50K in annual income. For a definition of the variables, see text section 2 (Data). \*\*\*  $p < 0.01$ , \*\*  $p < 0.05$ , \*  $p < 0.1$

**APPENDIX B: Blinder-Oaxaca Decomposition of White-African American Gaps. Contributors to**

**Differences in Coefficients**

|                                        | Non-Hispanic Black |                                  |                                   |                                  |
|----------------------------------------|--------------------|----------------------------------|-----------------------------------|----------------------------------|
|                                        | Unbanked           | Underbanked                      | Fully Banked                      | AFS User                         |
| Male                                   | 0.04<br>(0.028)    | 0.015<br>(0.025)                 | -0.058<br>(0.029)                 | 0.059<br>(0.031)                 |
| Age                                    | 1.104*<br>(0.061)  | -1.06*<br>(0.564)                | -0.063<br>(0.064)                 | -0.043<br>(0.683)                |
| Age squared                            | -0.532<br>(0.336)  | 0.478<br>(0.308)                 | 0.061<br>(0.349)                  | 0.229<br>(0.373)                 |
| US_born                                | 0.016<br>(0.127)   | 0.115**<br>(0.115)               | -0.129<br>(0.131)                 | 0.096<br>(0.140)                 |
| Less than high school                  | 0.022<br>(0.029)   | 0.046*<br>(0.027)                | <b>-0.068**</b><br><b>(0.031)</b> | <b>0.075**</b><br><b>(0.033)</b> |
| Highschool graduate                    | -0.067<br>(0.042)  | 0.012<br>(0.038)                 | 0.051<br>(0.044)                  | -0.032<br>(0.047)                |
| Some college                           | 0.018<br>(0.024)   | -0.0003<br>(0.022)               | -0.019<br>(0.025)                 | 0.029<br>(0.027)                 |
| Family income below 20K                | -0.009<br>(0.067)  | 0.030<br>(0.061)                 | -0.022<br>(0.069)                 | -0.030<br>(0.074)                |
| Family income between 20 and 35K       | 0.010<br>(0.026)   | -0.005<br>(0.024)                | -0.011<br>(0.027)                 | -0.005<br>(0.029)                |
| Unemployed                             | -0.014<br>(0.025)  | -0.005<br>(0.024)                | 0.020<br>(0.027)                  | -0.013<br>(0.028)                |
| Disabled                               | 0.012<br>(0.023)   | 0.016<br>(0.022)                 | -0.027<br>(0.025)                 | -0.005<br>(0.026)                |
| Retired                                | 0.009<br>(0.010)   | <b>0.023**</b><br><b>(0.010)</b> | <b>-0.032**</b><br><b>(0.013)</b> | 0.020*<br>(0.012)                |
| Other                                  | -0.004<br>(0.011)  | 0.008<br>(0.010)                 | -0.004<br>(0.012)                 | -0.015<br>(0.013)                |
| Fin. Lit: inflation, interest and risk | -0.011<br>(0.008)  | 0.008<br>(0.008)                 | 0.003<br>(0.008)                  | 0.011<br>(0.009)                 |
| Fin. Lit: savings factor               | 0.003<br>(0.007)   | -0.008<br>(0.007)                | 0.005<br>(0.007)                  | -0.012<br>(0.008)                |
| Fin. Lit: basic calculations factor    | 0.006<br>(0.006)   | -0.0005<br>(0.006)               | -0.0005<br>(0.007)                | -0.003<br>(0.007)                |
| Network: friends and family            | <b>0.106***</b>    | 0.004                            | <b>-0.110***</b>                  | -0.012                           |

|                                        |                 |                  |                 |                  |
|----------------------------------------|-----------------|------------------|-----------------|------------------|
|                                        | <b>(0.022)</b>  | (0.018)          | <b>(0.023)</b>  | (0.021)          |
| Network: stores                        | 0.006           | <b>0.043**</b>   | <b>-0.048**</b> | <b>0.044**</b>   |
|                                        | (0.018)         | <b>(0.018)</b>   | <b>(0.020)</b>  | <b>(0.021)</b>   |
| Trust in financial institutions factor | -0.007          | 0.003            | 0.004           | -0.012           |
|                                        | (0.006)         | (0.006)          | (0.007)         | (0.008)          |
| Present Biased                         | <b>-0.033**</b> | 0.009            | 0.025           | <b>-0.045**</b>  |
|                                        | <b>(0.016)</b>  | (0.015)          | (0.017)         | <b>(0.018)</b>   |
| Future Biased                          | 0.006           | <b>-0.044***</b> | <b>0.038**</b>  | <b>-0.056***</b> |
|                                        | (0.018)         | <b>(0.017)</b>   | <b>(0.019)</b>  | <b>(0.020)</b>   |
| Constant                               | -0.785**        | 0.300            | 0.517           | -0.086           |
|                                        | (0.329)         | (0.303)          | (0.344)         | (0.367)          |

---

**APPENDIX C: Reasons for not Having a Bank Account (% Choosing Each Reason)**

|                                                        | ALL   | Hispanic-Latino | Black        | White |
|--------------------------------------------------------|-------|-----------------|--------------|-------|
| <i>Bank Information confusing</i>                      | 43.7  | 41.86           | <b>48.33</b> | 41.49 |
| <i>Bank Did not Offer Needed Basic Services</i>        | 25.04 | 26.57           | 20.78        | 27.17 |
| <i>Bank Did not Feel Welcoming</i>                     | 19.93 | 19.45           | 17.24        | 21.76 |
| <i>Bank Too Far</i>                                    | 18.2  | 20.35           | 18.66        | 17.2  |
| <i>Inconvenient Hours</i>                              | 16.22 | <b>23.28</b>    | <b>21.23</b> | 8.57  |
| <i>Not Easy to Speak with Bank Staff</i>               | 11.69 | 8.21            | 11.23        | 13.13 |
| <i>Service Charges Too High</i>                        | 52.45 | 51.35           | 52.08        | 53.46 |
| <i>Didn't Have Enough Money to Have a Bank Account</i> | 49.33 | <b>58.64</b>    | 41.54        | 49.05 |
| <i>Minimum Balance Too High</i>                        | 45.95 | 45.47           | 36.68        | 52.89 |
| <i>Had Too Many Overdrafts</i>                         | 33.46 | 34.31           | 36.84        | 31.38 |
| <i>Bank Takes Too Long to Clear Checks</i>             | 30.86 | 32.44           | 22.31        | 35.45 |
| <i>Bank May Close</i>                                  | 28.92 | 31.62           | 25.32        | 27.27 |
| <i>I Don't Write Enough Checks</i>                     | 43.12 | 42.93           | 28.12        | 53.1  |
| <i>People I do Business With Do not Accept Checks</i>  | 24.17 | 26.44           | 17.99        | 26.72 |
| <i>Do Not Like Dealing with Banks</i>                  | 46.58 | 42.3            | 39.29        | 54.4  |
| <i>Do Not Trust Banks</i>                              | 35.32 | 33.75           | 29.56        | 42.28 |
| <i>Do Not think Can Manage Bank Account</i>            | 27.17 | 29.13           | 25.62        | 26.28 |
| <i>Have Credit Problems</i>                            | 25.61 | 27.55           | 21.02        | 27.86 |
| <i>Not Sure How to Open Bank Account</i>               | 9.51  | 11.83           | 9.19         | 8.03  |
| <i>N. Obs</i>                                          | 407   | 226             | 111          | 50    |

Notes: Authors' calculations using ALP data, survey 276. Sample restricted to families with less than 50K in annual income. Proportions calculated using sample weights.
